# Supplementary material for: RSRC1 loss-of-function variants cause mild to moderate autosomal recessive intellectual disability
Source: PubMed Central journal article supplement (PMC7174030; doi:10.1093/brain/awaa070), 2020-03-30
Supplement: awaa070_supplementary_data.pdf [file awaa070_supplementary_data.pdf]

## Supplementary information

### Content

1. Supplementary Genetic Methods
2. Supplementary Tables
3. Supplementary Figure
4. Supplementary References

### 1. Supplementary Genetic Methods

#### *DNA isolation*

Genomic DNA was extracted from whole blood from family members using DNeasy Blood & Tissue kit (Qiagen, Hilden Germany), according to the manufacturer's instructions.

#### *Array-CGH*

Array-CGH was performed for the siblings of Amish ancestry (pts 1-4) using a 180 k microarray according to the manufacturer's instructions (Agilent Technologies, Santa Clara, CA, USA). Agilent Cytogenomics software v3.3 was then used to analyse the results.

#### *Exome Sequencing*

After standard DNA extraction, exome sequencing (ES) was performed in all families. In the family of Middle Eastern ancestry (patient 10) trio WES was performed, whereas the remaining patients were studied through proband-ES. WES was performed as previously described by Kariminejad et al. (2016) and Yang et al (2014). The quality of the sequence reads was assessed by generating QC statistics with FastQC (<http://www.bioinformatics.bbsrc.ac.uk/projects/fastqc>). BWA with default parameters was

used for the read alignment to the reference human genome (hg19, UCSC assembly, February 2009) (Li and Durbin, 2009). According to established best practices (DePristo et al., 2011), HaplotypeCaller algorithm in the GATK package was used for quality score recalibration, indel realignment, and variant calling (McKenna et al., 2010). Subsequently, variants were annotated with ANNOVAR (Wang et al., 2010) and then filtered for population genetics and impact on the protein function. Variants with a minor allele frequency (MAF)  $>0.01$  in control databases (internal database of 10000 exomes, GnomAD, GME, Iranome, and Ensembl) were excluded. Subsequently, the variant analysis was performed through bioinformatic prediction tools (SIFT, Mutation Taster, and Human Splice Finder) and were further filtered on the basis of their CADD and GERP scores were also calculated. Eventually, the most interesting candidate variants were confirmed through Sanger sequencing.

## 2. Supplementary Tables

**Supplementary Table I Genetic findings and clinical features of *RSRC1* patients.**

|                                               | Family I                                         |                                                      |                                                      |                                                 | Family II                  |                                                    |                            | Family III                                      |                                                 | Family IV                                       | Family V                                    |
|-----------------------------------------------|--------------------------------------------------|------------------------------------------------------|------------------------------------------------------|-------------------------------------------------|----------------------------|----------------------------------------------------|----------------------------|-------------------------------------------------|-------------------------------------------------|-------------------------------------------------|---------------------------------------------|
|                                               | Pt 1 (II-2)                                      | Pt 2 (II-3)                                          | Pt 3 (II-4)                                          | Pt 4 (II-5)                                     | Pt 5 (II-3)                | Pt 6 (II-1)                                        | Pt 7 (II-2)                | Pt 8 (II-2)                                     | Pt 9 (II-1)                                     | Pt 10 (II-2)                                    | Pt 11 (II-1)                                |
| <b>Age; sex</b>                               | 3 y; F                                           | 6 y; M                                               | 5 y; M                                               | 11 mo; M                                        | 6 y; M                     | 14 y; F                                            | 3 y; F                     | 9 y; M                                          | 11 y; M                                         | 4 y; M                                          | 16 y; F                                     |
| <b>Ancestry</b>                               | Amish                                            | Amish                                                | Amish                                                | Amish                                           | Persian                    | Persian                                            | Persian                    | Pakistani                                       | Pakistani                                       | Saudi                                           | EUR/ME                                      |
| <b><i>RSRC1</i> variants [NM_001271838.1]</b> | c.158,256,914_158,338,237del (hom) <sup>†</sup>  | c.158,256,914_158,338,237del (hom) <sup>†</sup>      | c.158,256,914_158,338,237del (hom) <sup>†</sup>      | c.158,256,914_158,338,237del (hom) <sup>†</sup> | c.784C>T (p.Gln262*) (hom) | c.784C>T (p.Gln262*) (hom)                         | c.784C>T (p.Gln262*) (hom) | c.157,839,811_157,840,314del (hom) <sup>‡</sup> | c.157,839,811_157,840,314del (hom) <sup>‡</sup> | c.250C>T (p.Arg84*) (hom)                       | c.441_447dupAGAAAAG (p.Glu150Argfs*6) (hom) |
| <b>Consanguinity</b>                          | +                                                | +                                                    | +                                                    | +                                               | +                          | +                                                  | +                          | +                                               | +                                               | +                                               | +                                           |
| <b>Previous miscarriages</b>                  | +                                                | -                                                    | -                                                    | -                                               | -                          | -                                                  | -                          | -                                               | -                                               | -                                               | -                                           |
| <b>Birth history</b>                          | Floppy                                           | Normal                                               | Normal                                               | Normal                                          | Floppy                     | Floppy                                             | Floppy                     | Normal                                          | Normal                                          | Floppy                                          | Floppy                                      |
| <b>FTT</b>                                    | +                                                | +                                                    | -                                                    | -                                               | -                          | -                                                  | -                          | -                                               | -                                               | +                                               | -                                           |
| <b>Dysmorphic features</b>                    | +                                                | +                                                    | +                                                    | +                                               | +                          | +                                                  | +                          | -                                               | -                                               | +                                               | +                                           |
| <b>Global DD/ID (degree)</b>                  | +                                                | +/<br>+ (mild)                                       | +                                                    | +                                               | +/<br>+ (mod)              | +/<br>+ (mod)                                      | +                          | +/<br>+ (mod)                                   | +/<br>+ (mod)                                   | +                                               | +/<br>+ (mild)                              |
| <b>Speech delay</b>                           | N/A                                              | +                                                    | +                                                    | +                                               | N/A                        | N/A                                                | N/A                        | N/A                                             | N/A                                             | +                                               | +                                           |
| <b>Behavioral abnormalities</b>               | -                                                | ASD                                                  | ADHD, ASD                                            | -                                               | ASD                        | ASD                                                | ASD                        | ADHD                                            | ADHD                                            | -                                               | SCT                                         |
| <b>Hypotonia</b>                              | +++                                              | ++                                                   | +                                                    | ++                                              | ++                         | ++                                                 | ++                         | +                                               | +                                               | +                                               | ++                                          |
| <b>Hyporeflexia</b>                           | +                                                | -                                                    | -                                                    | -                                               | +                          | +                                                  | +                          | -                                               | -                                               | +                                               | -                                           |
| <b>Movement disorders</b>                     | -                                                | Gait ataxia                                          | Gait ataxia                                          | -                                               | Gait ataxia                | Gait ataxia (until 4 y)                            | -                          | -                                               | -                                               | Truncal ataxia                                  | Bradykinesia, ataxic gait                   |
| <b>Seizures</b>                               | -                                                | -                                                    | -                                                    | -                                               | N/A                        | -                                                  | FS, GTCS                   | FS                                              | -                                               | GTCS, abnormal EEG                              | -                                           |
| <b>Eye findings</b>                           | Strabismus                                       | -                                                    | Strabismus                                           | -                                               | Strabismus                 | -                                                  | -                          | -                                               | -                                               | Strabismus, ptosis                              | Strabismus                                  |
| <b>Dysphagia/GI reflux</b>                    | +/+                                              | -/-                                                  | -/-                                                  | -/-                                             | -/-                        | -/-                                                | -/-                        | -/-                                             | -/-                                             | +/+                                             | -/+                                         |
| <b>Musculoskeletal abnormalities</b>          | -                                                | PP, cubitus valgus                                   | PP, cubitus valgus                                   | -                                               | -                          | -                                                  | -                          | PP                                              | PP                                              | -                                               | PP, cubitus valgus, short toes              |
| <b>Other clinical features</b>                | Weak cry, drooling, redundant skin, skin dimples | Drooling, redundant skin, skin dimples, incontinence | Drooling, redundant skin, skin dimples, incontinence | Redundant skin, skin dimples                    | Weak cry                   | Weak cry, drooling, urinary and bowel incontinence | Weak cry, drooling         | -                                               | -                                               | Neonatal intestinal obstruction, tracheomalacia | Mitral valve prolapse                       |
| <b>Brain MRI</b>                              | Normal                                           | Prominent subarachnoid spaces                        | Prominent subarachnoid spaces                        | N/A                                             | Mild cerebral atrophy      | Normal                                             | Normal                     | Normal                                          | Normal                                          | Left temporo-parietal atrophy                   | Normal                                      |

**Supplementary Table I Genetic findings and clinical features of *RSRC1* patients (Continued).**

|                                        | Family VI                                  |                             |                                                | Family VII             |                        |                        | Maddirevula <i>et al</i> , 2018      | Perez <i>et al</i> , 2018          |
|----------------------------------------|--------------------------------------------|-----------------------------|------------------------------------------------|------------------------|------------------------|------------------------|--------------------------------------|------------------------------------|
|                                        | Pt 12 (II-6)                               | Pt 13 (II-4)                | Pt 14 (II-3)                                   | Pt 15 (II-5)           | Pt 16 (II-8)           | Pt 17 (II-9)           | 3 pts                                | 5 pts                              |
| Age; sex                               | 6 y; F                                     | 15 y; M                     | 16 y; F                                        | 22 y; F                | 16 y; F                | 12 y; F                | 4-10 y; 2M-1F                        | 0.5-8 y; 3F-2M                     |
| Ancestry                               | Pakistani                                  | Pakistani                   | Pakistani                                      | Egyptian               | Egyptian               | Egyptian               | Malaysian                            | Bedouin                            |
| <i>RSRC1</i> variants [NM_001271838.1] | c.532-1G>A (hom)                           | c.532-1G>A (hom)            | c.532-1G>A (hom)                               | c.3G>T (p.Met1?) (hom) | c.3G>T (p.Met1?) (hom) | c.3G>T (p.Met1?) (hom) | c.268C>T (p.Arg90*) (hom)            | c.205C>T (p.Arg69*) (hom)          |
| Consanguinity                          | +                                          | +                           | +                                              | +                      | +                      | +                      | + (3)                                | + (5)                              |
| Previous miscarriages                  | + (2)                                      | + (2)                       | + (2)                                          | +(1)                   | + (1)                  | + (1)                  | -                                    | -                                  |
| Birth history                          | Normal                                     | Normal                      | Normal                                         | Normal                 | Normal                 | Normal                 | N/A                                  | Normal                             |
| FTT                                    | N/A                                        | N/A                         | N/A                                            | No                     | No                     | No                     | + (1)                                | -                                  |
| Dysmorphic features                    | +                                          | +                           | +                                              | -                      | -                      | -                      | -                                    | + (5)                              |
| Global DD/ID (degree)                  | +/<br>+ (mod)                              | +/<br>+ (mod)               | +/<br>+ (mod)                                  | +/<br>+ (mod)          | +/<br>+ (mod)          | +/<br>+ (mod)          | + (3)/<br>+ (mild) (2)               | + (5)/<br>+ (mild-mod) (2)         |
| Speech delay                           | +                                          | +                           | -                                              | -                      | +                      | -                      | + (1)                                | + (4)                              |
| Behavioural abnormalities              | Aggressive behaviour                       | Aggressive behaviour        | SCT                                            | ASD                    | Aggressive behaviour   | ASD                    | -                                    | TT (4), ASD (1), ADHD (4)          |
| Hypotonia                              | +                                          | +                           | +                                              | +                      | +                      | +                      | -                                    | + (5)                              |
| Hyporeflexia                           | +                                          | -                           | -                                              | -                      | -                      | -                      | -                                    | -                                  |
| Movement disorders                     | -                                          | -                           | -                                              | -                      | -                      | -                      | -                                    | Fine motor impairment (4)          |
| Seizures                               | FS, GTCS                                   | FS, GTCS                    | N/A                                            | -                      | -                      | FS                     | FS (1)                               | FS (5), epilepsy (1)               |
| Eye findings                           | -                                          | -                           | -                                              | Normal                 | Normal                 | Normal                 | -                                    | -                                  |
| Dysphagia/Reflux                       | +/-                                        | +/+                         | -/-                                            | -/-                    | -/-                    | +/-                    | -                                    | -                                  |
| Musculoskeletal abnormalities          | PP, sandal gap, short 5 <sup>th</sup> toes | Cubitus valgus, genu valgum | PP                                             | PP                     | PP                     | -                      | Feet deformities (2)                 | -                                  |
| Other clinical features                | Redundant skin                             | Redundant skin              | Redundant skin, urinary and bowel incontinence | -                      | -                      | -                      | Recurrent respiratory infections (1) | Incontinence (4), microcephaly (1) |
| Brain MRI                              | N/A                                        | N/A                         | N/A                                            | Normal                 | Normal                 | Normal                 | Temporal lobes atrophy (1)           | Normal (5)                         |

ADHD = attention deficit hyperactivity disorder; ASD = autism spectrum disorder; DD = developmental delay; EUR = European; FS = febrile seizures; FTT = failure to thrive; GTCS = generalized tonic-clonic seizures; hom = homozygous; ID = intellectual disability; ME = Middle Eastern; mo = months; mod = moderate; N/A = not available; PP = pes planus; Pt = patient; SCT = sluggish cognitive tempo; y = years. †hg19; 81-kb deletion encompassing exons 9-10 of *RSRC1* and whole *MLF1*. ‡hg19; 500-bp deletion encompassing exon 2 of *RSRC1*.

**Supplementary Table 2** Frequency of the rearrangements involving *RSRC1* reported in this study.

| <i>RSRC1</i> Deletion        | Decipher | ClinVar |
|------------------------------|----------|---------|
| c.157,839,811_157,840,314del | -        | -       |
| c.158,256,914_158,338,237del | -        | -       |

**Supplementary Table 3** Frequency and predicted effect of all the reported *RSRC1* variants.

| <i>RSRC1</i> variant [NM_001271838.1]   | g. (hg19)                         | Internal database‡ | GeneDx database | ExAC/ gnomAD     | GME | Iranome | Ensembl      | ClinVar    | SIFT     | Mutation Taster | Human splice finder               | GERP score | CADD score | ACMG class                    |
|-----------------------------------------|-----------------------------------|--------------------|-----------------|------------------|-----|---------|--------------|------------|----------|-----------------|-----------------------------------|------------|------------|-------------------------------|
| c.3G>T p.(Met11le)                      | g.157839896G>T                    | -                  | -               | -                | -   | -       | -            | -          | Damaging | Disease causing | N/A                               | 5.66       | 25         | Pathogenic (PVS1, PM2, PP3)   |
| c.205C>T (p.Arg69*)                     | g.157841665C>T                    | -                  | 1/130,874       | -                | -   | -       | rs868818936  | Pathogenic | Damaging | Disease causing | N/A                               | 4.17       | 39         | Pathogenic (PVS1, PM2, PP3)   |
| c.250C>T (p.Arg84*)                     | g.157841710C>T                    | -                  | 1/130,874       | -                | -   | -       | rs267599665  | -          | Damaging | Disease causing | N/A                               | 5.39       | 39         | Pathogenic (PVS1, PM2, PP3)   |
| c.268C>T (p.Arg90*)                     | g.157841728C>T                    | -                  | 1/183,384       | -                | -   | -       | rs1183090232 | Pathogenic | Damaging | Disease causing | N/A                               | 3.61       | 37         | Pathogenic (PVS1, PM2, PP3)   |
| c.441_447dup AGAAAAG (p.Glu150Arg fs*6) | g.157920981_157920987dupAGA AAAAG | -                  | -               | -                | -   | -       | -            | -          | N/A      | Disease causing | N/A                               | 2.13       | N/A        | Likely pathogenic (PVS1, PM2) |
| c.532-1G>A                              | g.158072645G>A                    | -                  | 1/174,424       | 0.000012 (2 het) | -   | -       | rs754550509  | -          | N/A      | Disease causing | Most probably affecting splicing† | 5.88       | 32         | Pathogenic (PVS1, PM2, PP3)   |
| c.784C>T (p.Gln262*)                    | g.158261148C>T                    | -                  | -               | -                | -   | -       | -            | -          | Damaging | Disease causing | N/A                               | 4.06       | 35         | Likely pathogenic (PVS1, PM2) |

CADD = Combined Annotation Dependent Depletion; GERP = Genomic Evolutionary Rate Profiling; gnomAD = Genome Aggregation Database; GME = Greater Middle East (GME) Variome Project; N/A = not applicable; PM2: Pathogenic Moderate 2; PP3 = Pathogenic Supporting 3; PVS1 = Pathogenic Very Strong 1; SIFT = Sorting Intolerant From Tolerant. †Alteration of the WT acceptor site. ‡Database of 10,000 in-house control exomes.

**Supplementary Table 4** Summary of genetic findings and clinical features of previously reported

*RSRC1* patients.

|                                               | <b>Maddirevula 2018, pt1</b> | <b>Maddirevula 2018, pt2</b>       | <b>Maddirevula 2018, pt3</b> | <b>Perez 2018 II-6</b>     | <b>Perez 2018 II-7</b>     | <b>Perez 2018 II-10</b>    | <b>Perez 2018 II-11</b>    | <b>Perez 2018 II-12</b>    |
|-----------------------------------------------|------------------------------|------------------------------------|------------------------------|----------------------------|----------------------------|----------------------------|----------------------------|----------------------------|
| <b>Age; sex</b>                               | 10 y; M                      | 4 y; M                             | 7 y; F                       | 8 y; F                     | 7 y; M                     | 3.5 y; F                   | 5 y; F                     | 0.5 y; M                   |
| <b>Ancestry</b>                               | Malaysian                    | Malaysian                          | Malaysian                    | Bedouin                    | Bedouin                    | Bedouin                    | Bedouin                    | Bedouin                    |
| <b><i>RSRC1</i> variants [NM_001271838.1]</b> | c.268C>T; (p.Arg90*) (hom)   | c.268C>T; (p.Arg90*) (hom)         | c.268C>T; (p.Arg90*) (hom)   | c.205C>T; (p.Arg69*) (hom) | c.205C>T; (p.Arg69*) (hom) | c.205C>T; (p.Arg69*) (hom) | c.205C>T; (p.Arg69*) (hom) | c.205C>T; (p.Arg69*) (hom) |
| <b>Consanguinity</b>                          | +                            | +                                  | +                            | +                          | +                          | +                          | +                          | +                          |
| <b>Previous miscarriages</b>                  | -                            | -                                  | -                            | -                          | -                          | -                          | -                          | -                          |
| <b>Birth history</b>                          | N/A                          | N/A                                | N/A                          | Normal                     | Normal                     | Normal                     | Normal                     | Normal                     |
| <b>FTT</b>                                    | +                            | -                                  | -                            | -                          | -                          | -                          | -                          | -                          |
| <b>Dysmorphic features</b>                    | -                            | -                                  | -                            | +                          | +                          | +                          | +                          | +                          |
| <b>Global DD/ID (degree)</b>                  | +/-<br>+ (mild)              | +                                  | +/-<br>+ (mild)              | +/-<br>+ (mild-mod)        | +/-<br>+ (mild-mod)        | +                          | +                          | +                          |
| <b>Speech delay</b>                           | N/A                          | +                                  | N/A                          | +                          | +                          | +                          | +                          | N/A                        |
| <b>Behavioural abnormalities</b>              | -                            | -                                  | -                            | TT, ASD, ADHD              | TT, ADHD                   | TT, ADHD                   | TT, ADHD                   | N/A                        |
| <b>Hypotonia</b>                              | -                            | -                                  | -                            | +                          | +                          | +                          | +                          | +                          |
| <b>Hyporeflexia</b>                           | -                            | -                                  | -                            | -                          | -                          | -                          | -                          | -                          |
| <b>Movement disorders</b>                     | -                            | -                                  | -                            | Fine motor impairment      | Fine motor impairment      | Fine motor impairment      | Fine motor impairment      | N/A                        |
| <b>Seizures</b>                               | -                            | FS                                 | -                            | FS                         | FS                         | FS, epilepsy               | FS                         | FS                         |
| <b>Eye findings</b>                           | -                            | -                                  | -                            | -                          | -                          | -                          | -                          | -                          |
| <b>Dysphagia/Reflux</b>                       | -                            | -                                  | -                            | -                          | -                          | -                          | -                          | -                          |
| <b>Musculoskeletal abnormalities</b>          | -                            | Bilateral calcaneo-varus deformity | Metatarsus valgus            | -                          | -                          | -                          | -                          | -                          |
| <b>Other clinical features</b>                | -                            | Recurrent respiratory infections   | -                            | Incontinence, microcephaly | Incontinence               | Incontinence               | Incontinence               | N/A                        |
| <b>Brain MRI</b>                              | Normal                       | Temporal lobes atrophy             | N/A                          | Normal                     | Normal                     | Normal                     | Normal                     | Normal                     |

ADHD = attention deficit hyperactivity disorder; ASD = autism spectrum disorder; DD = developmental delay; FS = febrile seizures; FTT = failure to thrive; hom = homozygous; ID = intellectual disability; mod = moderate; N/A = not available; pt = patient; TT = temper tantrums; y = years.

### 3. Supplementary Figure

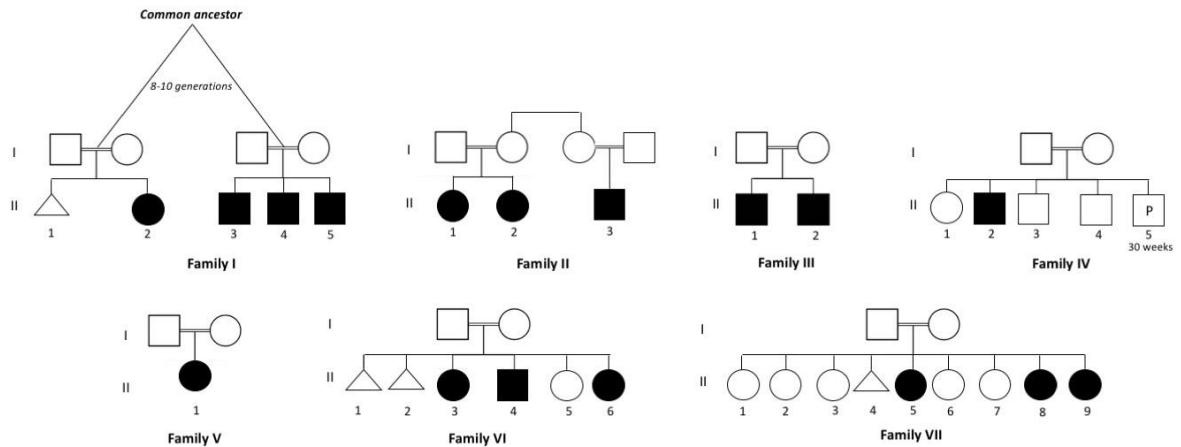

**Supplementary Figure 1 Pedigrees of the reported families.** Displayed symbols make reference to the Standardized Human Pedigree Nomenclature (Bennett *et al.*, 2008). Family I is an extended Amish family with a common ancestor composed of two distantly related families of different Amish *demes* (Lancaster and Indiana).

#### 4. Supplementary References

Bennett RL, French KS, Resta RG, Doyle DL. Standardized human pedigree nomenclature: update and assessment of the recommendations of the National Society of Genetic Counselors. *J Genet Couns* 2008; 17(5): 424–33.

DePristo MA, Banks E, Poplin R, Garimella KV, Maguire JR, Hartl C, et al. A framework for variation discovery and genotyping using next-generation DNA sequencing data. *Nat Genet* 2011; 43: 491–8.

Li H, Durbin R. Fast and accurate short read alignment with Burrows-Wheeler transform. *Bioinformatics* 2009; 25: 1754–60.

Kariminejad A, Ghaderi-Sohi S, Hossein-Nejad Nedai H, Varasteh V, Moslemi AR, Tajsharghi H. Lethal multiple pterygium syndrome, the extreme end of the RYR1 spectrum. *BMC Musculoskelet Disord* 2016; 17: 109.

McKenna A, Hanna M, Banks E, Sivachenko A, Cibulskis K, Kernytsky A, et al. The Genome Analysis Toolkit: a MapReduce framework for analyzing next-generation DNA sequencing data. *Genome Res* 2010; 20: 1297–303.

Wang K, Li M, Hakonarson H. ANNOVAR: functional annotation of genetic variants from high-throughput sequencing data. *Nucleic Acids Res* 2010; 38: e164.

Yang Y, Muzny DM, Xia F, Niu Z, Person R, Ding Y, et al. Molecular findings among patients referred for clinical whole-exome sequencing. *JAMA* 2014; 312(18): 1870–9.
